# Supplementary material for: Umberto Laffi filologo e storico del diritto
Source: MDPI journal article supplement (doi:10.3390/ani12010084), 2004-01-01
Supplement: s1 [file s1]

**Table S1.** Summary statistics for Re-sequencing and RNA-sequencing data.

| Sequencing | ID        | Sample          | Read 1      | Read 2      | Total reads | Mapped reads | Mapped rate |
|------------|-----------|-----------------|-------------|-------------|-------------|--------------|-------------|
| Re-seq     | Sire      | Blood           | 265,049,733 | 265,049,733 | 530,099,466 | 494,051,940  | 93.20%      |
|            | Dam       | Blood           | 253,291,721 | 253,291,721 | 506,583,442 | 482,508,144  | 95.25%      |
| RNA-seq    | Offspring | Loin muscle     | 28,606,852  | 28,606,852  | 57,213,704  | 52,928,967   | 92.51%      |
|            |           | Femoral muscle  | 23,248,921  | 23,248,921  | 46,497,842  | 43,816,858   | 94.23%      |
|            |           | Backfat         | 25,069,553  | 25,069,553  | 50,139,106  | 46,475,064   | 92.69%      |
|            |           | Abdominal fat   | 22,528,446  | 22,528,446  | 45,056,892  | 39,677,151   | 88.06%      |
|            |           | Pituitary gland | 24,057,648  | 24,057,648  | 48,115,296  | 45,215,265   | 93.97%      |
|            |           | Hypothalamus    | 22,693,187  | 22,693,187  | 45,386,374  | 42,282,881   | 93.16%      |
